1 **Co-infection of a novel *Chlamydia*-like organism and *Henneguya* sp. (Myxosporea,**  
2 **Myxobolidae) in snakeskin gourami *Trichopodus pectoralis* (Regan 1910), in Thailand**

3

4 Nguyen Dinh-Hung<sup>1</sup>, Ha Thanh Dong<sup>2</sup>, Channarong Rodkhum<sup>1</sup>, Chayanit Soontara<sup>3</sup>, Sukkrit  
5 Nimitkul<sup>3</sup>, Satid Chatchaiphan<sup>3</sup>, Prapansak Srisapome<sup>3,4</sup>, Pattanapon Kayansamruaj<sup>3,4\*</sup>

6 <sup>1</sup>Fish Infectious Diseases Research Unit (FID RU), Department of Veterinary Microbiology,  
7 Faculty of Veterinary Science, Chulalongkorn University, Bangkok, Thailand

8 <sup>2</sup>Faculty of Science and Technology, Suan Sunandha Rajabhat University, Bangkok,  
9 Thailand.

10 <sup>3</sup>Department of Aquaculture, Faculty of Fisheries, Kasetsart University, Bangkok, Thailand

11 <sup>4</sup>Center of Excellence in Aquatic Animal Health Management, Faculty of Fisheries, Kasetsart  
12 University, Bangkok, Thailand

13

14 **Running head:** *Chlamydia*-like organism and *Henneguya* sp. in snakeskin gourami

15

16 \*Corresponding author:

17 P Kayansamruaj, [pattanapon.k@ku.th](mailto:pattanapon.k@ku.th)

18

19 **Keywords:** *Chlamydiales*, *Chlamydia*-like organism, *Henneguya* sp., Oxytetracycline,  
20 snakeskin gourami, *Trichopodus pectoralis*, 16S rRNA.

21

22 **ACKNOWLEDGEMENTS**

23 The work was carried out under the Center of Excellence in Aquatic Animal Health  
24 Management, Faculty of Fisheries, Kasetsart University.

25 **DATA AVAILABILITY STATEMENT**

26 The data that support the findings of this study are available on request.

27 **CONFLICT OF INTEREST**

28 The authors declare no conflict of interest

29

30 Snakeskin gourami, *Trichopodus pectoralis*, is native to Asia and commonly found in the  
31 Mekong and Chao Phraya basins of Cambodia, Thailand, Southern Vietnam, and Laos  
32 ([Paepke, 2009](#)). In Thailand, snakeskin gourami is a highly economic species and an  
33 important aquaculture freshwater species ([FAO, 2020](#)). Parasitic and bacterial diseases are  
34 major challenges in farming of this species ([Kanchan, Imjai, Kanchan, & Chaiyara, 2020](#)).  
35 However, studies of disease occurrence in snakeskin gourami are still very scarce ([U.S Fish](#)  
36 [& Wildlife Service, 2019](#)).

37 Myxosporeans are diverse, common parasites causing serious damage to wild and cultivated  
38 fish species worldwide ([Lom & Dyková, 2006](#)). The genus *Henneguya* comprises more than  
39 200 species and is among the most specious myxosporean genera in the family *Myxobolidae*  
40 ([Eiras & Adriano, 2012](#)). *Henneguya* sp. infection usually produce cyst-like structures on gill  
41 filaments leading to their destruction, resulting in respiratory distress ([Lom & Dyková, 2006](#);  
42 [Molnar, 2002](#)). Other commonly known pathogens causing gill cysts in fish are bacteria from  
43 the *Chlamydiales* order, typically causing epithelial cysts (epitheliocystis) in skin and gills  
44 ([Nowak & LaPatra, 2006](#); [Pawlikowska-Warych & Deptula, 2016](#)). Chlamydial infections  
45 reveal distinctive pathology which possibly depend on the chlamydial species, infected host,  
46 and affected tissue ([Borel, Polkinghorne, & Pospischil, 2018](#)). To date, lack of culture  
47 methods for chlamydial pathogens is a major setback to *in vitro* studies ([Borel et al., 2018](#);  
48 [Nowak & LaPatra, 2006](#)). In the present study, we describe firstly, the systemic pathology  
49 caused by a novel *Chlamydia*-like organism (CLO) and comment on the gill parasite  
50 *Henneguya* sp. (Myxosporea, Myxobolidae) infecting the same fish, based on molecular  
51 analysis and histopathology observations.

52 In March 2021, two grow-out ponds in central Thailand recorded above-normal mortality  
53 involving snakeskin gourami fingerlings. Regarding case history, snakeskin gourami  
54 fingerlings ( $0.3g \pm 0.05$ ) produced using traditional method, were purchased from a hatchery.

55 Male and female broodstock were mated naturally in earthen pond containment. Eggs were  
56 spawned in natural bubble nests made by male gourami within the same pond. Offspring  
57 were harvested at the size of 3.0 cm (weight 0.2-0.3g) and 150,000 fish were delivered to two  
58 mentioned ponds. Fingerlings were contained within 5m<sup>2</sup> net in the pond and fed daily with  
59 28% protein commercial feed (Betagro, Thailand) at 3% body weight. Mortality was noticed  
60 on day 2 after fingerlings introduction. Daily mortality was around 20, 50, 150, 200, and 400  
61 fish between 1 and 5 days after disease onset (dao). Affected fish exhibited lethargy, gasping  
62 at the water surface, and appetite loss followed by mortality. At 3 dao, sea salt was added to  
63 the pond daily (200 kg in total), though no reduction of mortality was observed. Disease  
64 diagnosis performed on-site at 6 dao revealed no external lesions on the body surface of fish  
65 (Figure 1a). Wet mounts of skin mucus and gills showed no external parasites, though  
66 formation of multiple characteristic cyst-like was prevalent in gill filament (Figure 1b). This  
67 observation initially led us to tentative diagnosis of an “*epitheliocystis*” case. Afterwards,  
68 oxytetracycline (OTC) (200 mg/g active ingredient, Pharmatech, Thailand) was continually  
69 given to fish via feed admixture (5g OTC per 1 kg feed) for 7 days. After OTC treatment,  
70 decrease in daily mortality was obvious from 150, 50, and 16 fish at 7, 8, and 9 dao,  
71 consecutively. No mortality was found after OTC treatment was applied for 4 days (10 dao).  
72 Due to the effective antibiotic treatment, we assumed the disease might have been primarily  
73 caused by CLO. Indeed, OTC considerably declined mortalities from chlamydia infection, as  
74 recorded previously ([Goodwin, Park, & Nowak, 2005](#)), and further supported this treatment  
75 regime for future outbreaks.

76 Representative 10 fingerling fish were sampled at 6 dao for further investigation under  
77 approval from Kasetsart University's Institutional Animal Care and Use Committee (ID:  
78 ACKU63-FIS-009). Swabs from brain, liver, and kidney samples were streaked onto tryptic  
79 soy agar (Himedia, India) and incubated at 28°C for bacterial isolation. Samples of whole-

80 body fish ( $n=5$ ) and separated gills were fixed in 10% neutral buffered formalin, routinely  
81 processed and stained with hematoxylin and eosin, and examined by light microscope.  
82 Genomic DNA was isolated from infected gill using Tissue Genomic DNA Kit (Geneaid,  
83 Taiwan) according to manufacturer's instructions. Presence of chlamydial DNA was screened  
84 firstly using primers 16SIGF (5'-CGGCGTGGATGAGGCAT-3') and 16Sigr (5'-  
85 TCAGTCCCAGTGTTGGC-3') (Everett et al., [1999](#)). All positive samples were subjected to  
86 another PCR with *Chlamydiales*-specific primers 16SIGF (5'-CGGCGTGGATGAGGCAT-  
87 3') and 806R (5'-GGAC TACCAGGGTATCTAAT-3') (Relman 1993). PCR assays were  
88 performed as previously described by Sood et al ([2019](#)). Expected amplicons of first and  
89 second PCR methods were 300 bp and 766 bp, respectively. Amplified PCR products (766  
90 bp) were purified and sequenced (U2Bio, Thailand). The multiple sequence alignment of  
91 partial 16S rRNA gene sequence of the *T. pectoralis* chlamydial agent from 4 infected fish  
92 indicated that the sequences were identical and consensus sequence was deposited in  
93 GenBank (accession number MW832782). BLASTn query against available nucleotide  
94 sequences deposited in GenBank database determined taxonomic identity. Phylogenetic tree  
95 was constructed using the neighbor-joining method with 1,000 bootstraps, after multiple  
96 alignments using ClustalW in MEGA X ([Kumar, Stecher, Li, Knyaz, & Tamura, 2018](#)).

97 All collected samples were positive after repeated PCR amplification of *Chlamydiales* 16S  
98 rRNA gene (Figure S1). Our sequence respectively showed 93.5% and 92.3% similarity with  
99 98% query coverage to the uncultured bacterium (accession no. LN612734.1, unpublished)  
100 and *Candidatus* Piscichlamydia sp. associated with epitheliocystis infection in cyprinid fish  
101 (accession no. KY380090.1, [Sellyei, Molnár, & Székely, 2017](#)). These bacteria formed a  
102 clade as an unclassified family belonging to the genus *Candidatus* Piscichlamydia within the  
103 order *Chlamydiales* (Figure 4) and also shared >90% sequence similarity with other members  
104 of the family *Ca. Piscichlamydiaceae*, suggesting that these agents belonged to the same

105 family ([Everett et al., 1999](#)). Since the causative agent shared <95% similarity with other  
106 previously reported *Chlamydia*-like 16S rRNA sequences, the sequenced bacteria are novel  
107 from the order *Chlamydiales* (Everett et al [1999](#)). Therefore, the name *Candidatus*  
108 *Piscichlamydia trichopodus* was proposed to describe the novel CLO in snakeskin gourami.  
109 The findings are consistent with remark of Stride et al ([2014](#)) that each new piscine host has  
110 revealed the presence of a phylogenetically unique and novel chlamydial pathogen.

111 Histological examination revealed colonization of intracellular bacteria in several organs  
112 including gill filaments (Figure 2a, b), submucosa of the intestine (Figure 2c, d), caudal fin  
113 tissue (Figure 2e, f). Obviously, the bacteria dominantly infects primary gill filaments more  
114 than secondary gill filaments. There were dense, rounded to oval-shaped intracellular bacteria  
115 observed at cartilaginous junction of primary and secondary gill filaments, resulting in  
116 disconnection of the two components (Figure 2d). Similar changes were observed at  
117 cartilaginous junction of the caudal fin (Figure 2f). These findings suggested that this bacteria  
118 might target cartilaginous tissues. However, no culturable bacteria were isolated from internal  
119 organs on nutrient agar plates, which combined with positive PCR results, suggests that the  
120 observed bacteria probably are intracellular unculturable CLO. Interestingly, histological  
121 analyses showed that “cysts” found in infected fish were not epitheliocystis as tentatively  
122 diagnosed and later identified as plasmodia of a myxosporean. Presence of numerous  
123 plasmodia was observed at gill filaments (Figure 3a). Myxospores and plasmodia  
124 demonstrated asynchronous development with young, rounded plasmodium, enveloped by a  
125 wall formed by epithelium cells of gill filaments (Figure 3b). When plasmodium grew, the  
126 envelope ruptured and released myxospores into adjacent tissue (Figure 3c). Myxospores  
127 possessed typical features of the genus *Henneguya* with two equal polar capsules, sporoplasm  
128 located at the posterior pole of spore, and two long superimposed tail processes (Figure 3d).  
129 Histological and morphological changes may relate to the observed clinical signs. Mortalities

130 were likely associated with concurrent infection of CLO with parasitic infestation by  
131 *Henneguya* sp. Generally, diagnosis of CLO agents is primarily by histopathology figuring of  
132 epithelial cysts, mainly found in fish gills ([Pawlikowska-Warych & Deptula, 2016](#)); however,  
133 histopathological changes associated with infection of a novel intracellular bacteria showed  
134 massive bacterial colonization in the infected tissue but no obvious epithelial cysts  
135 observation. This histopathological feature should be considered for presumptive diagnosis of  
136 this novel pathogen. Previous reports also found mixed infections of CLO along with gill  
137 parasites in red sea bream *Pagrus major* ([Nowak & LaPatra, 2006](#)), African catfish *Clarias*  
138 *gariepinus* ([Steigen et al., 2013](#)), striped catfish *Pangasius hypophthalmus* ([Sood et al.,](#)  
139 [2018](#)), and rohu *Labeo rohita* ([Sood et al., 2019](#)), which suggested some link between  
140 parasitic infestation and CLO, involved in their causation ([Nowak & LaPatra, 2006](#)). Our  
141 initial observation revealed no abnormal mortality in other fishes sharing the same aquatic  
142 environment with the affected farms. It is unclear whether this novel bacterium has potential  
143 to cause significant impact on snakeskin gourami aquaculture. Further investigation on its  
144 host range, prevalence, disease risk factors, and transmission route may provide better  
145 understanding on biology of this pathogen and prevent its widespread.

146 Summarily, presence of pathogenic potential of mixed infection of a novel intracellular CLO  
147 (*Candidatus* *Piscichlamydia trichopodus*), and a gill parasite *Henneguya* sp. in snakeskin  
148 gourami in Thailand is firstly reported. This study expands knowledge on snakeskin gourami  
149 pathology, an important fish species in Asian aquaculture, and contributes to better  
150 understanding of diseases in this fish species.

151

152 **Reference**

- 153 Borel, N., Polkinghorne, A., & Pospischil, A. (2018). A Review on Chlamydial Diseases in  
154 Animals: Still a Challenge for Pathologists? *Veterinary Pathology*, 55(3), 374-390.  
155 <https://doi.org/10.1177/0300985817751218>
- 156 Eiras, J. C., & Adriano, E. A. (2012). A checklist of new species of *Henneguya* Thélohan,  
157 1892 (Myxozoa: Myxosporea, Myxobolidae) described between 2002 and 2012.  
158 *Systematic Parasitology*, 83(2), 95-104. <https://doi.org/10.1007/s11230-012-9374-7>
- 159 Everett, K. D. E., Bush, R. M., & Andersen, A. A. (1999). Emended description of the order  
160 *Chlamydiales*, proposal of *Parachlamydiaceae* fam. nov. and *Simkaniaceae* fam.  
161 nov., each containing one monotypic genus, revised taxonomy of the family  
162 *Chlamydiaceae*, including a new genus and five new species, and standards for the  
163 identification of organisms. *International Journal of Systematic and Evolutionary*  
164 *Microbiology*, 49(2), 415-440. <https://doi.org/10.1099/00207713-49-2-415>
- 165 FAO (2020). Fishery and Aquaculture Statistics. Global aquaculture production 1950-2018  
166 (FishstatJ). In: FAO Fisheries Division [online]. Rome. Updated 2020. Retrieved  
167 from [www.fao.org/fishery/statistics/software/fishstatj/en](http://www.fao.org/fishery/statistics/software/fishstatj/en)
- 168 Goodwin, A. E., Park, E., & Nowak, B. F. (2005). Successful treatment of largemouth bass,  
169 *Micropterus salmoides* (L.), with epitheliocystis hyperinfection. *Journal of Fish*  
170 *Diseases*, 28(10), 623-625. <https://doi.org/10.1111/j.1365-2761.2005.00662.x>
- 171 Kanchan, C., Imjai, P., Kanchan, N., & Chaiyara, A. (2020). Occurrence of parasitic and  
172 bacterial diseases in Thai freshwater fish. *Journal of Agricultural and Crop Research*,  
173 8(10), 210-214. [https://doi.org/10.33495/jacr\\_v8i10.20.168](https://doi.org/10.33495/jacr_v8i10.20.168)
- 174 Kumar, S., Stecher, G., Li, M., Knyaz, C., & Tamura, K. (2018). MEGA X: Molecular  
175 Evolutionary Genetics Analysis across Computing Platforms. *Molecular Biology and*  
176 *Evolution*, 35(6), 1547-1549. <https://doi.org/10.1093/molbev/msy096>



- 177 Lom, J., & Dyková, I. (2006). Myxozoan genera: definition and notes on taxonomy, life-  
178 cycle terminology and pathogenic species. *Folia Parasitologica*, 53(1), 1-36.  
179 <https://doi.org/10.14411/fp.2006.001>
- 180 Molnar, K. (2002). Site preference of fish myxosporeans in the gill. *Diseases of Aquatic*  
181 *Organisms*, 48(3), 197-207. <https://doi.org/10.3354/dao048197>
- 182 Nowak, B. F., & LaPatra, S. E. (2006). Epitheliocystis in fish. *Journal of Fish Diseases*,  
183 29(10), 573-588. <https://doi.org/10.1111/j.1365-2761.2006.00747.x>
- 184 Paepke, H. (2009). The Nomenclature of *Trichopodus pectoralis* REGAN, 1910; *Trichopus*  
185 *cantoris* SAUVAGE, 1884 and *Osphronemus saigonensis* BORODIN, 1930  
186 (Teleostei: Peciformes: Osphronemidae). *Vertebrate Zoology*, 59(1): 49–56
- 187 Pawlikowska-Warych, M., & Deptula, W. (2016). Characteristics of *chlamydia*-like  
188 organisms pathogenic to fish. *Journal of Applied Genetics*, 57(1), 135-141.  
189 <https://doi.org/10.1007/s13353-015-0303-8>
- 190 Relman, D., 1993. Universal bacterial 16S rRNA amplification and sequencing. In: Persing,  
191 D.H., Smith, T.F., Tenover, F.C., White, T.J. (Eds.), *Diagnostic Molecular Biology,*  
192 *Principles and Applications.* Mayo Foundation Rochester, MN, USA, pp. 489–495.
- 193 Sellyei, B., Molnár, K., & Székely, C. (2017). Diverse *chlamydia*-like agents associated with  
194 epitheliocystis infection in two cyprinid fish species, the common carp (*Cyprinus*  
195 *carpio* L.) and the gibel carp (*Carassius auratus gibelio* L.). *Acta Veterinaria*  
196 *Hungarica*, 65(1), 29-40. <https://doi.org/10.1556/004.2017.003>
- 197 Sood, N., Pradhan, P. K., Verma, D. K., Gupta, S., Ravindra, Dev, A. K., . . . Rathore, G.  
198 (2019). Epitheliocystis in rohu *Labeo rohita* (Hamilton, 1822) is caused by novel  
199 Chlamydiales. *Aquaculture*, 505, 539-543.  
200 <https://doi.org/10.1016/j.aquaculture.2019.03.007>

- 201 Sood, N., Pradhan, P. K., Verma, D. K., Yadav, M. K., Ravindra, Dev, A. K., . . . Sood, N. K.  
202 (2018). *Candidatus Actinochlamydia pangasiae* sp. nov. (*Chlamydiales*,  
203 *Actinochlamydiaceae*), a bacterium associated with epitheliocystis in *Pangasianodon*  
204 *hypophthalmus*. *Journal of Fish Diseases*, 41(2), 281-290.  
205 <https://doi.org/10.1111/jfd.12711>
- 206 Steigen, A., Nylund, A., Karlsbakk, E., Akoll, P., Fiksdal, I. U., Nylund, S., . . . Watanabe, K.  
207 (2013). ‘*Cand. Actinochlamydia clariae*’ gen. nov., sp. nov., a Unique Intracellular  
208 Bacterium Causing Epitheliocystis in Catfish (*Clarias gariepinus*) in Uganda. *PLOS*  
209 *ONE*, 8(6), e66840. <https://doi.org/10.1371/journal.pone.0066840>
- 210 Stride, M. C., Polkinghorne, A., & Nowak, B. F. (2014). Chlamydial infections of fish:  
211 Diverse pathogens and emerging causes of disease in aquaculture species. *Veterinary*  
212 *Microbiology*, 170(1-2), 19-27. <https://doi.org/10.1016/j.vetmic.2014.01.022>
- 213 U.S Fish & Wildlife Service (2019). Snakeskin Gourami (*Trichopodus pectoralis*) Ecological  
214 Risk Screening Summary. Retrieved from  
215 [https://www.fws.gov/fisheries/ans/erss/uncertainrisk/ERSS-Trichopodus-](https://www.fws.gov/fisheries/ans/erss/uncertainrisk/ERSS-Trichopodus-pectoralis_Final.pdf)  
216 [pectoralis\\_Final.pdf](https://www.fws.gov/fisheries/ans/erss/uncertainrisk/ERSS-Trichopodus-pectoralis_Final.pdf)
- 217

218 **Figures**

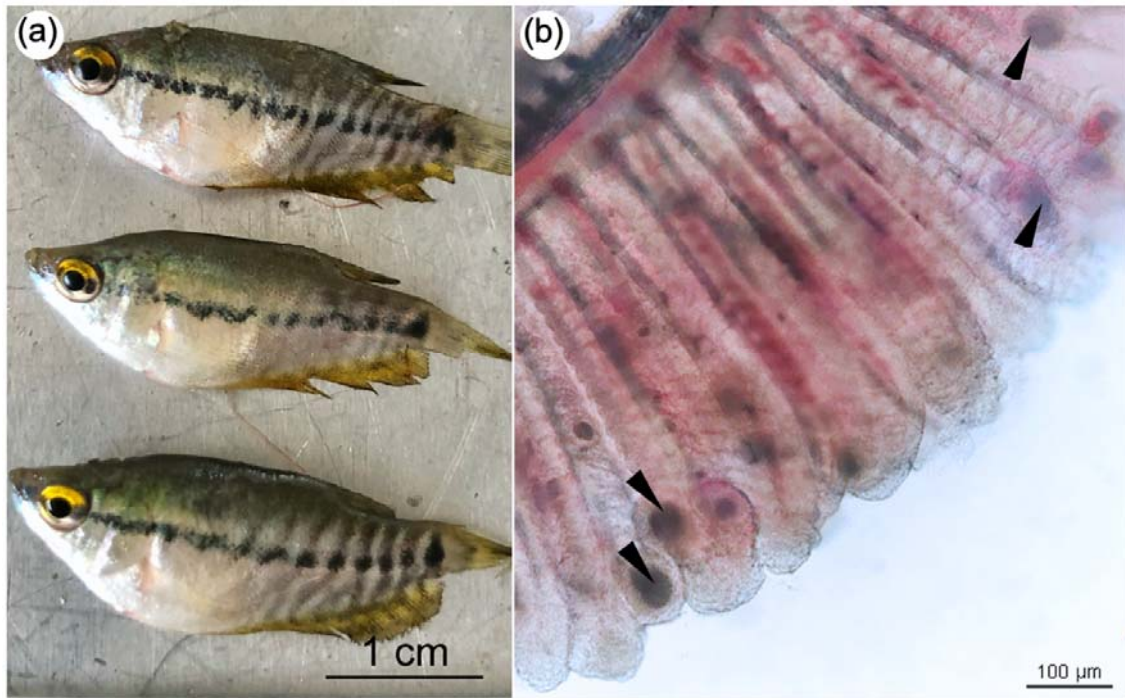

219

220 **FIGURE 1** (a) Snakeskin gourami (*Trichopodus pectoralis*), no external lesions on the body

221 surface of fish. (b) Wet mount preparations of infected fish gill showing numerous

222 morphological characteristics of "cysts" (arrowheads). The scale bars are shown in the

223 pictures.

224

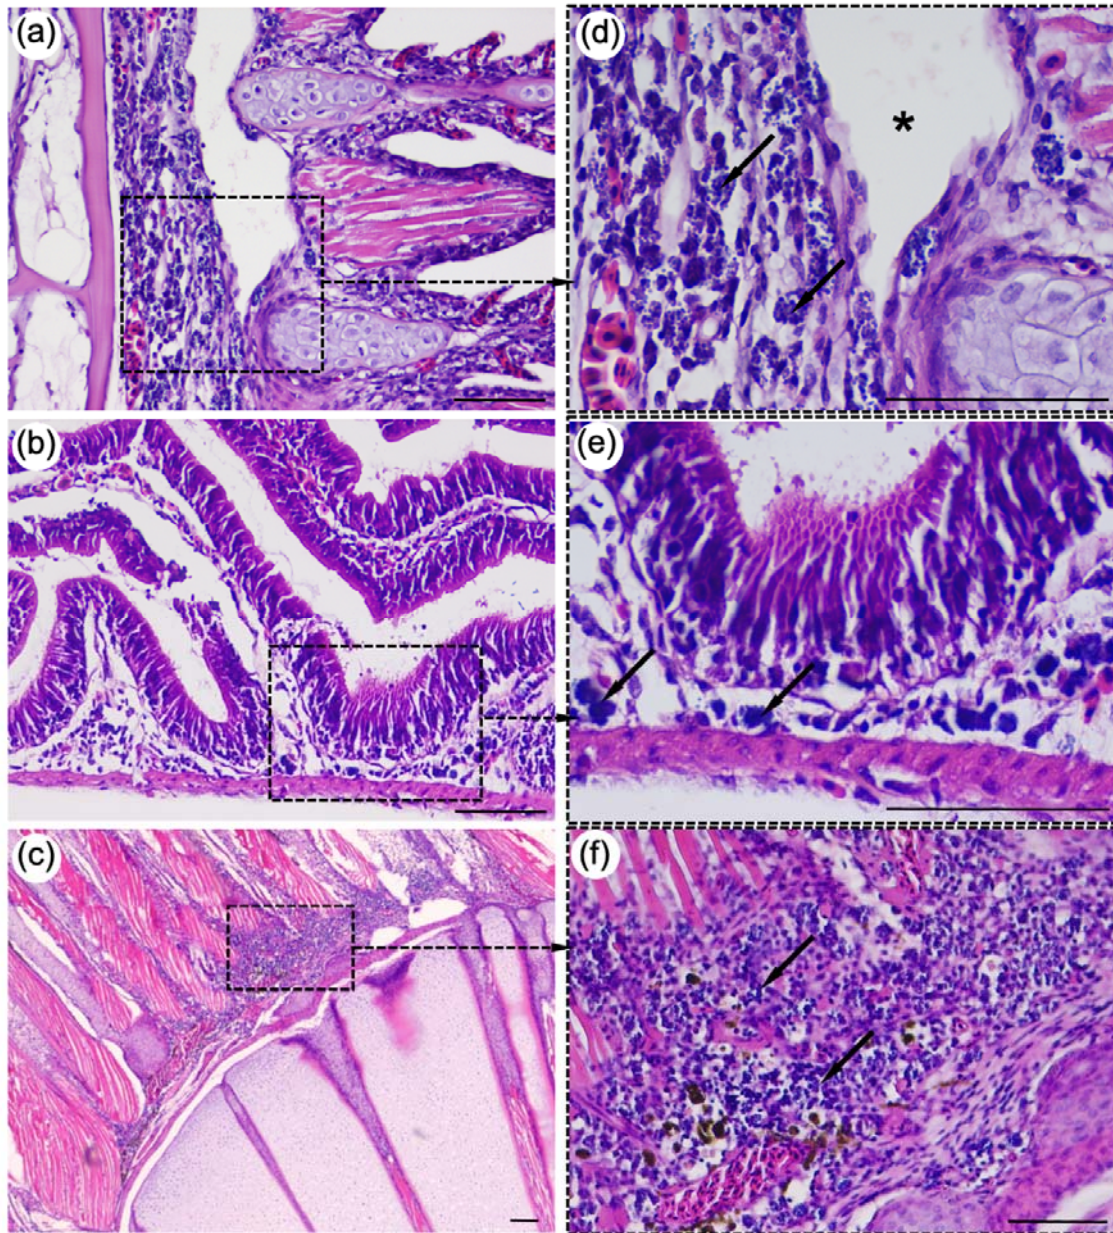

225

226 **FIGURE 2** Infected fish showed presence of a novel intracellular bacteria in the gill (a),  
227 submucosa of the intestine (b), and tail/caudal fin (c). Higher magnification indicated the  
228 colonization of dense, rounded to oval-shaped intracellular bacteria stained with blue color  
229 (arrows in Figure d, e and f). The bacteria were observed near the cartilaginous junctions of  
230 the primary and secondary gill filaments (d) and caudal fin (f) resulting in tissue  
231 disconnection (asterisk Figure d). The slides were stained with hematoxylin and eosin (H&E)  
232 and scale bars = 50  $\mu$ m.

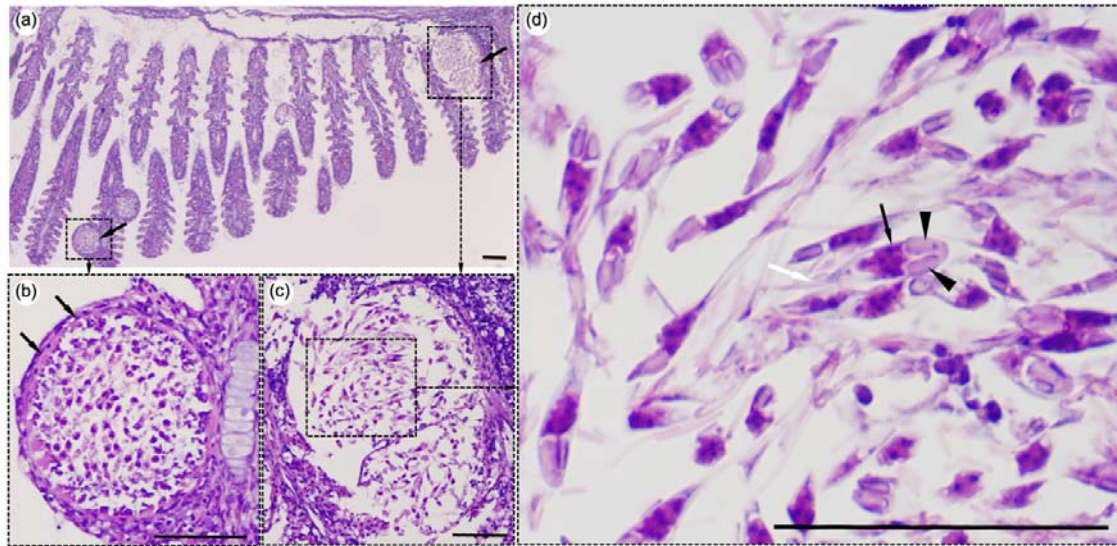

233

234 **FIGURE 3** Histological lesions in snakeskin gourami (*Trichopodus pectoralis*) gill infected  
235 with *Henneguya* sp. (a) Plasmodia (arrows) with different developmental stages. (b) young  
236 plasmodium was rounded and enveloped by a wall formed by epithelium cells (arrows),  
237 immature myxospores located peripherally within plasmodia and mature myxospores located  
238 centrally. (c) A grown plasmodium ruptured the envelope. (d) Myxospores possess typical  
239 features of a *Henneguya* sp., including two equal polar capsules (arrowheads), sporoplasm  
240 located at the posterior pole of spore (black arrow), and two long superimposed tail processes  
241 (white arrow). The slides were stained with hematoxylin and eosin (H&E) and scale bars =  
242 50  $\mu\text{m}$ .

243

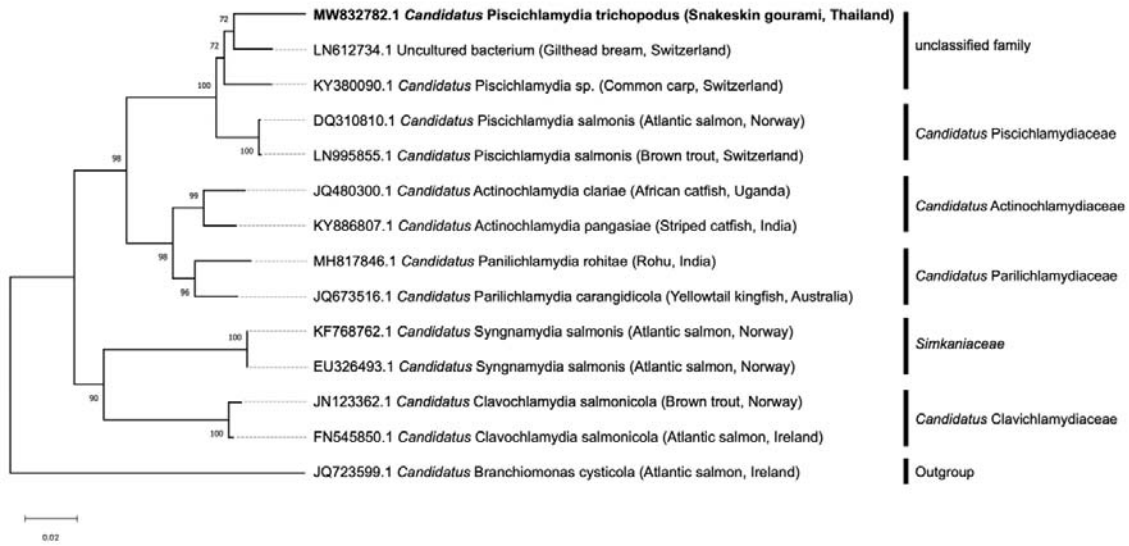

244

245 **FIGURE 4** Phylogenetic tree was constructed based on partial 16S rDNA sequence (766 bp)  
246 from snakeskin gourami in this study (MW832782) and closely related species. The  
247 accession numbers and taxonomic identities, as well as the host origins, of the organisms  
248 included in this phylogenetic analysis, are demonstrated. *Candidatus Branchiomonas*  
249 *cysticola* was selected as an out group. The tree was constructed using neighbor-joining  
250 method. The scale bar represents 0.02 - nucleotide substitution per site, whereas the number  
251 at the node of the tree indicates bootstrap value in percentage.

252

253 **Supplementary data**

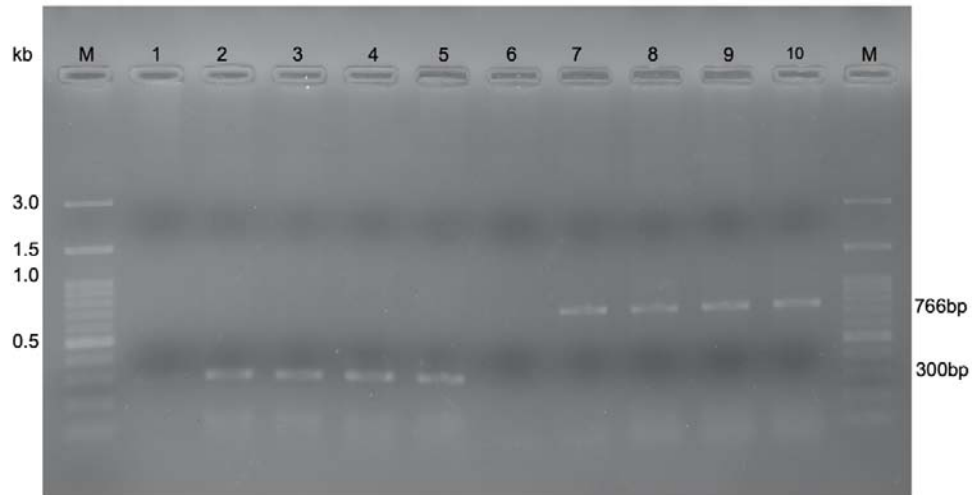

254

255 **Figure S1** PCR testing results confirmation under the agarose gel electrophoresis of samples  
256 from four representative fish. Lane 1 and 6 were amplified without DNA template from the  
257 primer set 1 and 2 as negative controls, respectively. Lane 2, 3, 4 and 5 were amplified with  
258 DNA template from the primer set 1 (300bp). Lane 7, 8, 9 and 10 were amplified with DNA  
259 template from the primer set 2 (766bp). Lane M was a DNA marker (Himedia, India).
